# Supplementary material
Source: publisher figshare collection journal article supplement (https://sage.figshare.com/articles/dataset/_/8796239)
Supplement: Supplementary file 1 [file 16118084]

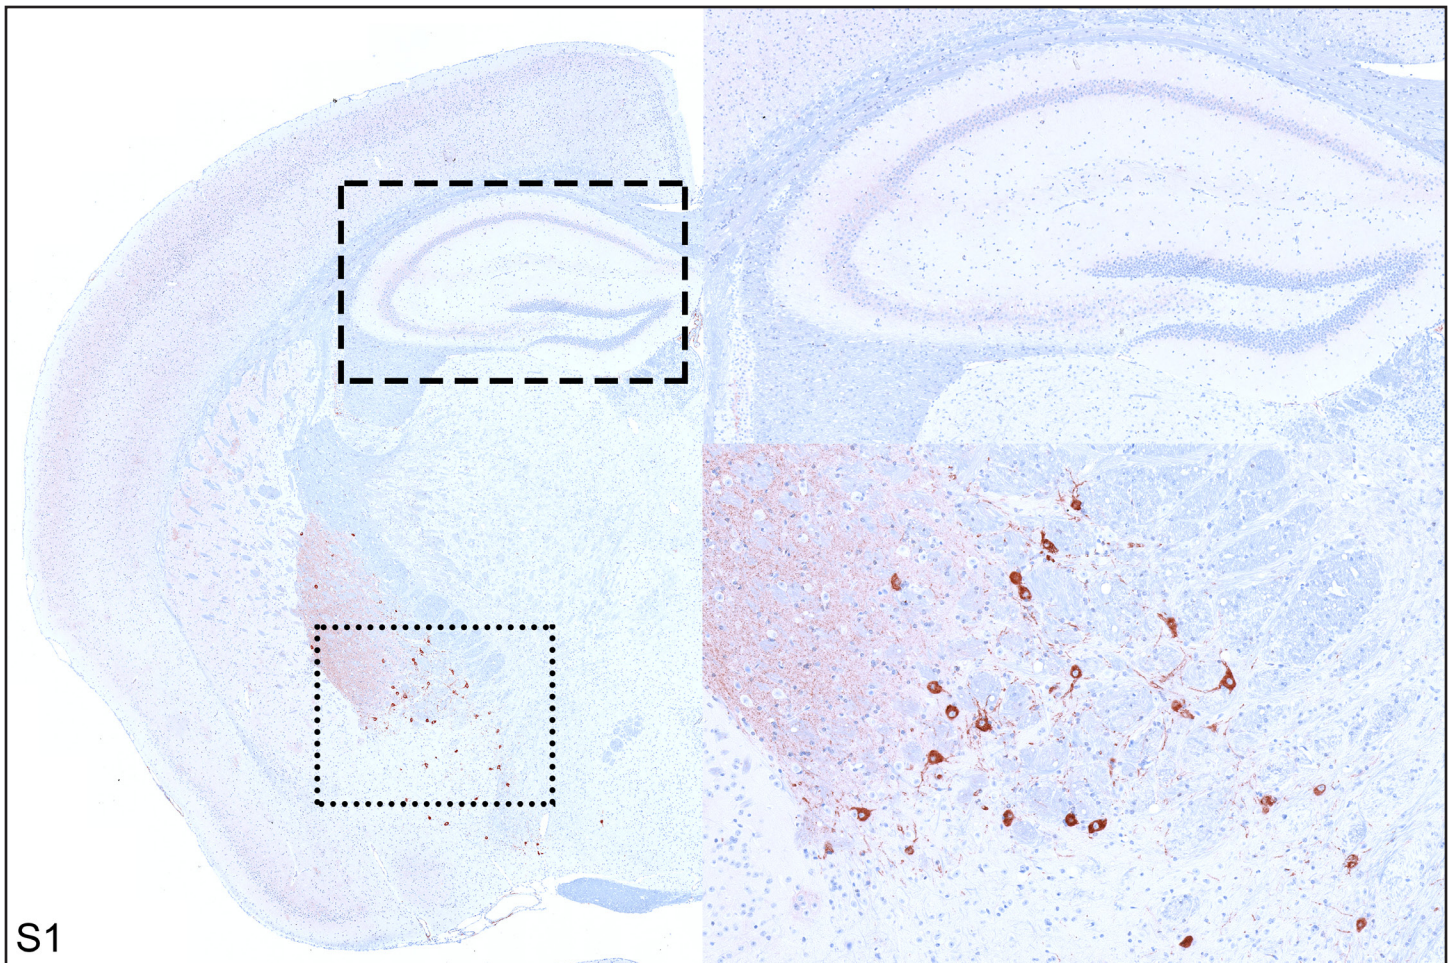

S1

**Supp Fig S1** – 56-week-old female C57BL/6J mouse, coronal section of the brain just caudal to the optic chiasm. Immunohistochemistry for p75NTR highlights a group of neurons in the medio-dorsal amygdalar nuclei (dotted box, higher magnification of the region in the dotted box is in the lower right). While this animal showed multiple clusters of PAS-positive granular deposits in the hippocampus (see Fig 7), no immunoreactivity for p75NTR is evident at this level (dashed box, higher magnification of the region in the dashed box is in the upper right).



Veterinary Pathology: Supplemental Materials.  
Tarrant et al. Spontaneous Incidental Brain Lesions in C57BL/6J Mice.

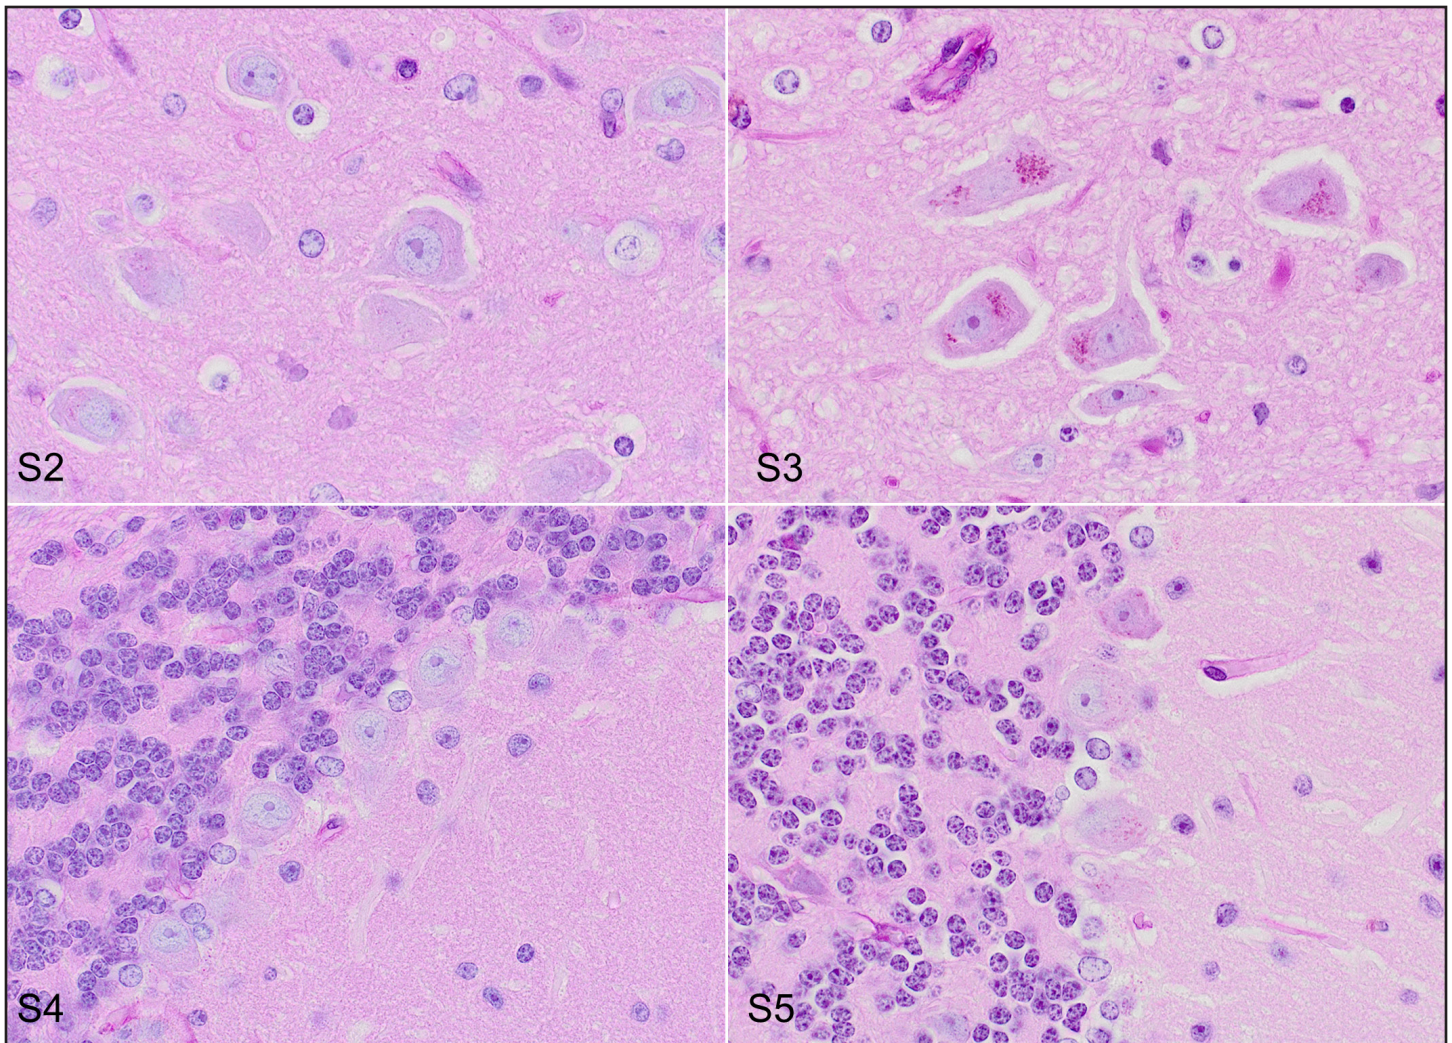

**Supp Figs S2-5. Figs S2 and S3.** Deep cerebellar nuclei, Periodic acid-Schiff (PAS). **Fig. S2.** Neurons contain few punctate PAS-positive lipofuscin granules in the deep cerebellar nucleus in this 17-week-old female C57BL/6J mouse. **Fig. S3.** Neurons exhibit moderate accumulation of PAS-positive lipofuscin granules in the deep cerebellar nucleus of this 78-week-old female C57BL/6J mouse. **Figs. S4 and S5.** Cerebellar Purkinje cells, PAS stain. **Fig. S4.** Purkinje cells in this 17-week-old female C57BL/6J mouse contain no PAS-positive material. **Fig. S5.** Few PAS-positive granules are in the Purkinje cells of this 78-week old female C57BL/6J mouse.



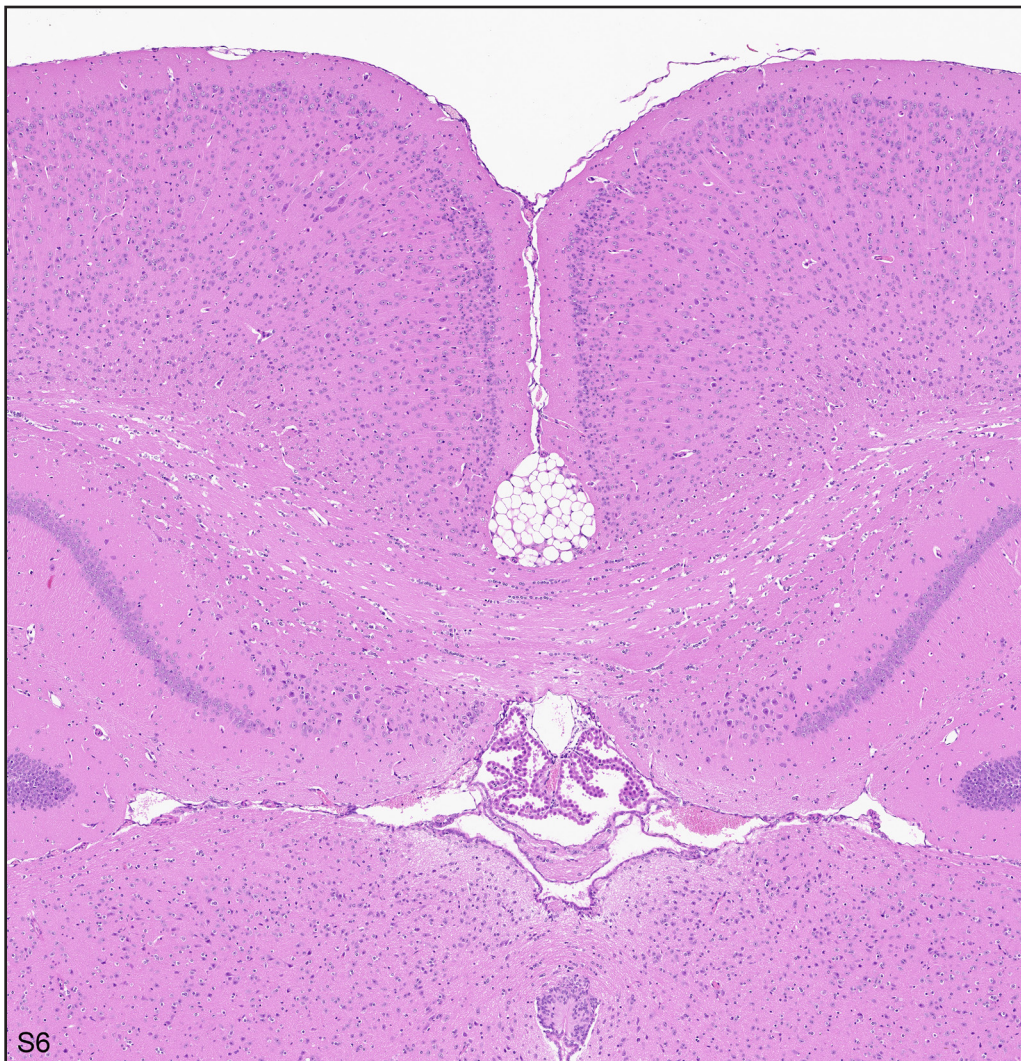

**Supp Fig S6.** 10-week-old female C57BL/6J mouse. A small lipomatous hamartoma is evident in the interhemispheric sulcus. Hematoxylin and eosin (HE).

**Veterinary Pathology: Supplemental Materials.**  
**Tarrant et al. Spontaneous Incidental Brain Lesions in C57BL/6J Mice.**

**Supplemental Table 1.** Spontaneous incidental/background brain pathology in C57BL/6J Mice. Details concerning primary antibodies and procedures used for the immunohistochemical examination of selected cases/lesions.

| <b>Epitope/Target</b> | <b>Primary antibody</b> | <b>Source</b>             | <b>Antigen retrieval</b> | <b>Working dilution</b> | <b>Incubation time</b> | <b>Mouse tissue/s used as control</b>                                                             | <b>Staining platform and detection system</b>                             |
|-----------------------|-------------------------|---------------------------|--------------------------|-------------------------|------------------------|---------------------------------------------------------------------------------------------------|---------------------------------------------------------------------------|
| GFAP                  | Rb pAb #Z0334           | Agilent/Dako              | HIER low pH              | 1:5000                  | 45 min RT              | FFPE brain (C+)<br>FFPE kidney (C-)                                                               | Leica BOND RXm, Bond Polymer Refine Detection Kit (#DS9800)               |
| IBA1                  | Rb pAb #019-19741       | Wako                      | HIER low pH              | 1:1500                  | 45 min RT              | FFPE liver (C+ and C-)                                                                            | Leica BOND RXm, Bond Polymer Refine Detection Kit (#DS9800)               |
| Neurofilament-L       | Rb mAb #2837            | Cell Signaling Technology | HIER low pH              | 1:500                   | 45 min RT              | FFPE brain (C+)<br>FFPE kidney (C-)                                                               | Leica BOND RXm, Bond Polymer Refine Detection Kit (#DS9800)               |
| p75NTR                | Rb mAb #8238            | Cell Signaling Technology | HIER low pH              | 1:100                   | 45 min RT              | FFPE brain (C+)<br>FFPE heart (C-)                                                                | Ventana discovery ultra, UltraView Universal DAB Detection Kit (#760-500) |
| Phospho-Tau (Thr181)  | Rb mAb #12885           | Cell Signaling Technology | HIER high pH             | 1:1200                  | 45 min RT              | FFPE brain from B6.Cg-Tg(Thy1-MAPT*P301S)2541Godt (C+)<br>FFPE kidney (C-)                        | Leica BOND RXm, Bond Polymer Refine Detection Kit (#DS9800)               |
| Synaptophysin         | Rb mAb #36406           | Cell Signaling Technology | HIER high pH             | 1:100                   | 45 min RT              | FFPE pancreas (C+ and C-)                                                                         | Leica BOND RXm, Bond Polymer Refine Detection Kit (#DS9800)               |
| Ubiquitin             | Ms mAb #3936            | Cell Signaling Technology | HIER low pH              | 1:1000                  | 45 min RT              | FFPE brain from B6.Cg-Tg(Thy1-APP <sup>Sw</sup> ,Thy1-PSEN1*L166P)21Jckr (C+)<br>FFPE kidney (C-) | Ventana discovery ultra, UltraView Universal DAB Detection Kit (#760-500) |
| Vinculin              | Rb mAb #13901           | Cell Signaling Technology | HIER low pH              | 1:1200                  | 45 min RT              | FFPE liver (C+ and C-)                                                                            | Leica BOND RXm, Bond Polymer Refine Detection Kit (#DS9800)               |

Abbreviations used in the table: Rb-Rabbit, Ms-Mouse, pAb-Polyclonal Antibody, mAb-Monoclonal Antibody, HIER-heat induced epitope retrieval, min-minutes, RT-room temperature, C+ positive control, C- negative control.
